# Supplementary figures and images for: Exploring the universal healthy human gut microbiota around the World
Source: PubMed Central journal article supplement — Comput Struct Biotechnol J. 2021 Dec 30;20:421–33. doi: 10.1016/j.csbj.2021.12.035 (PMC8749183; doi:10.1016/j.csbj.2021.12.035), 2021-12-30

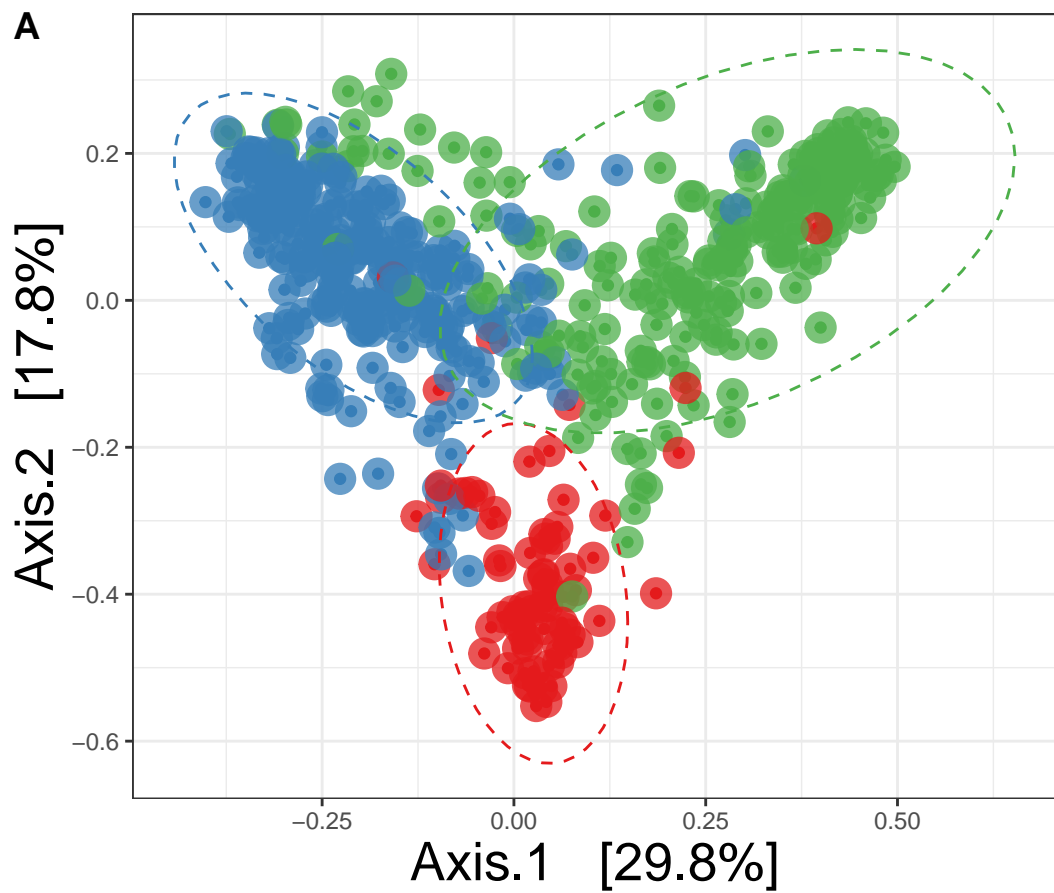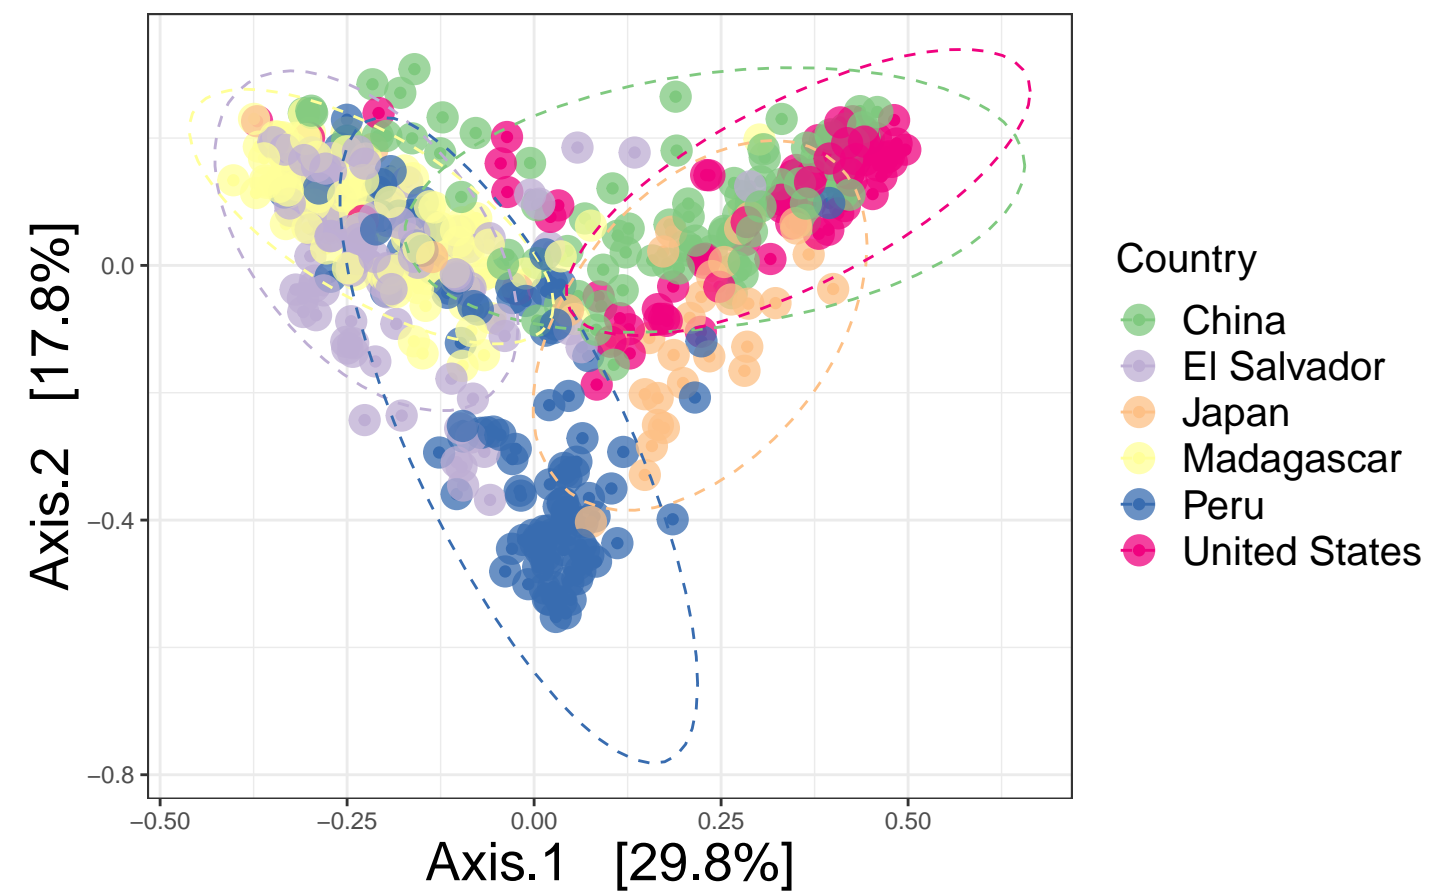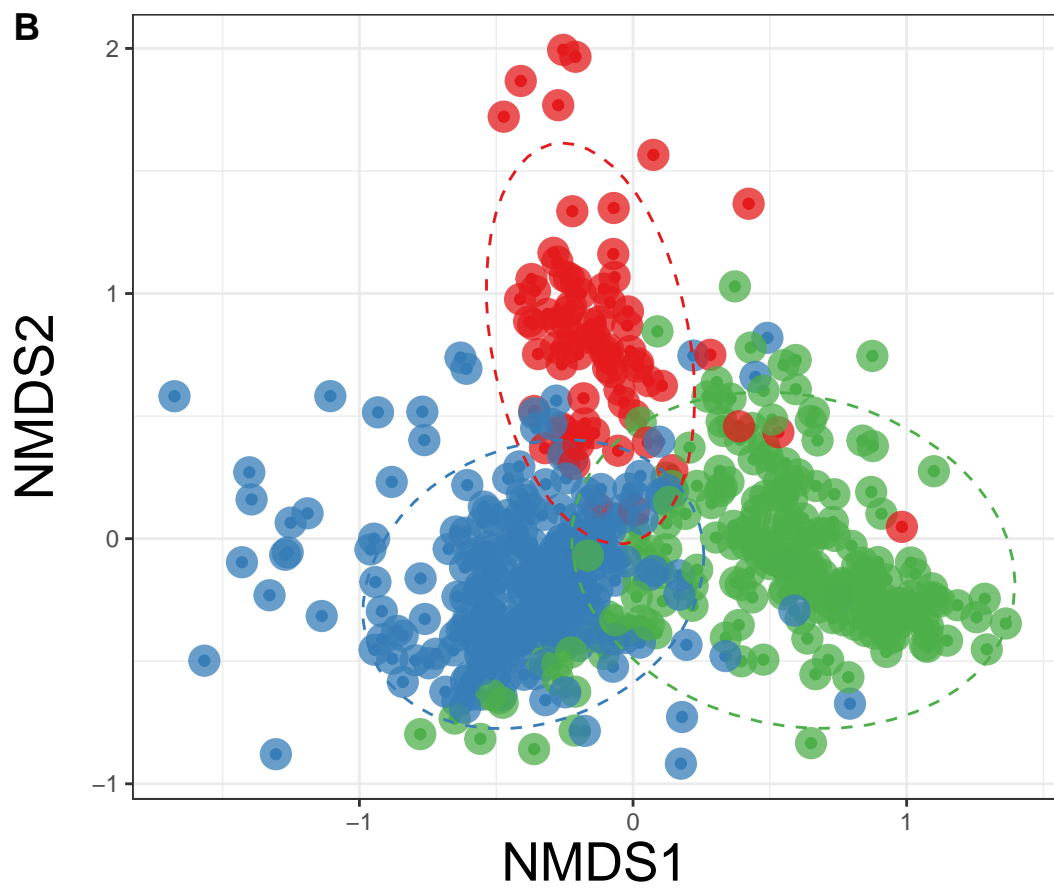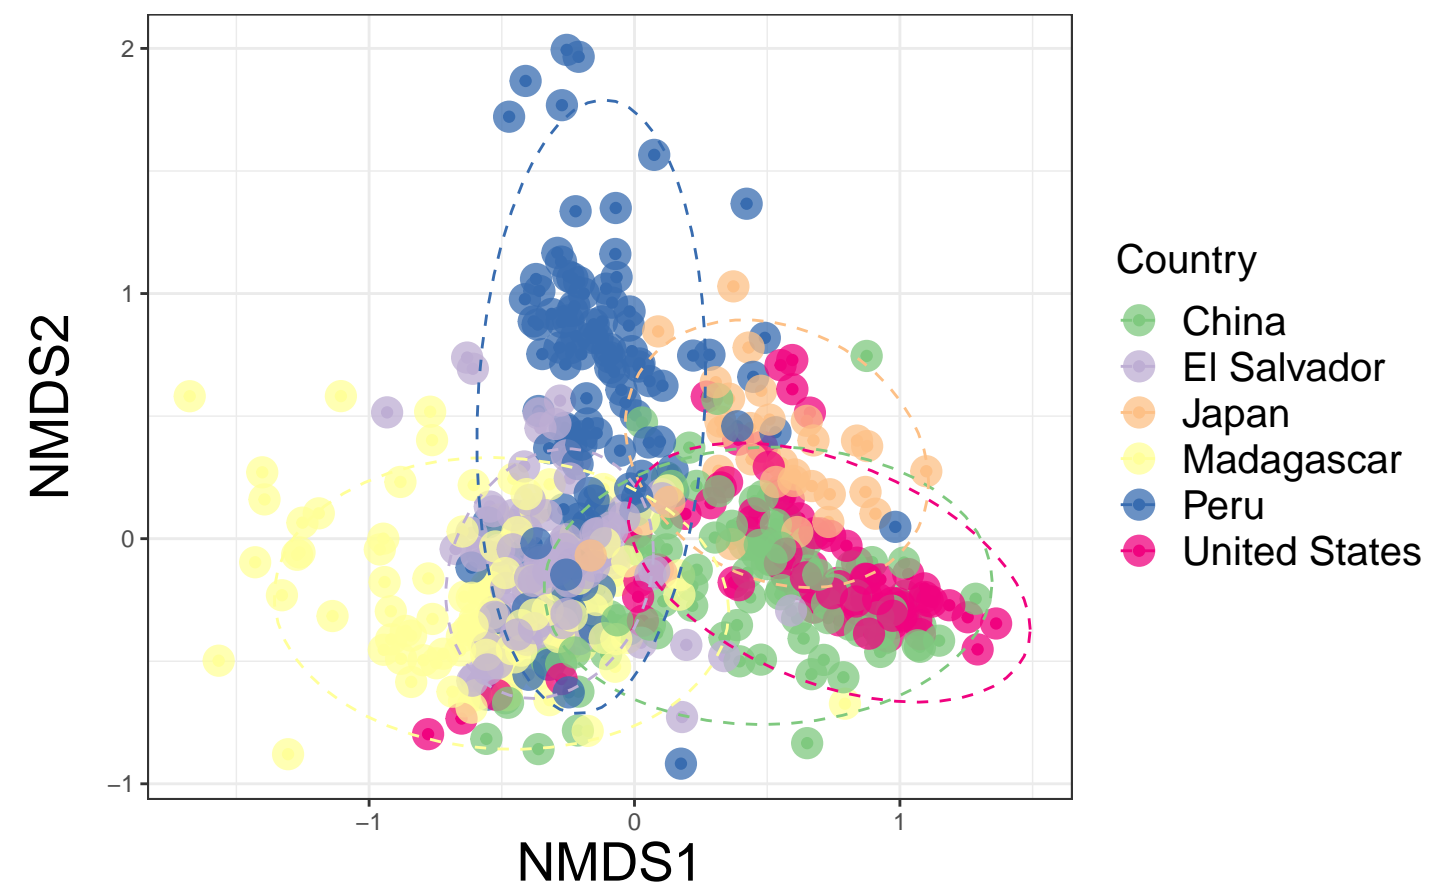

Supplement: mmc12.pdf [file mmc12.pdf]

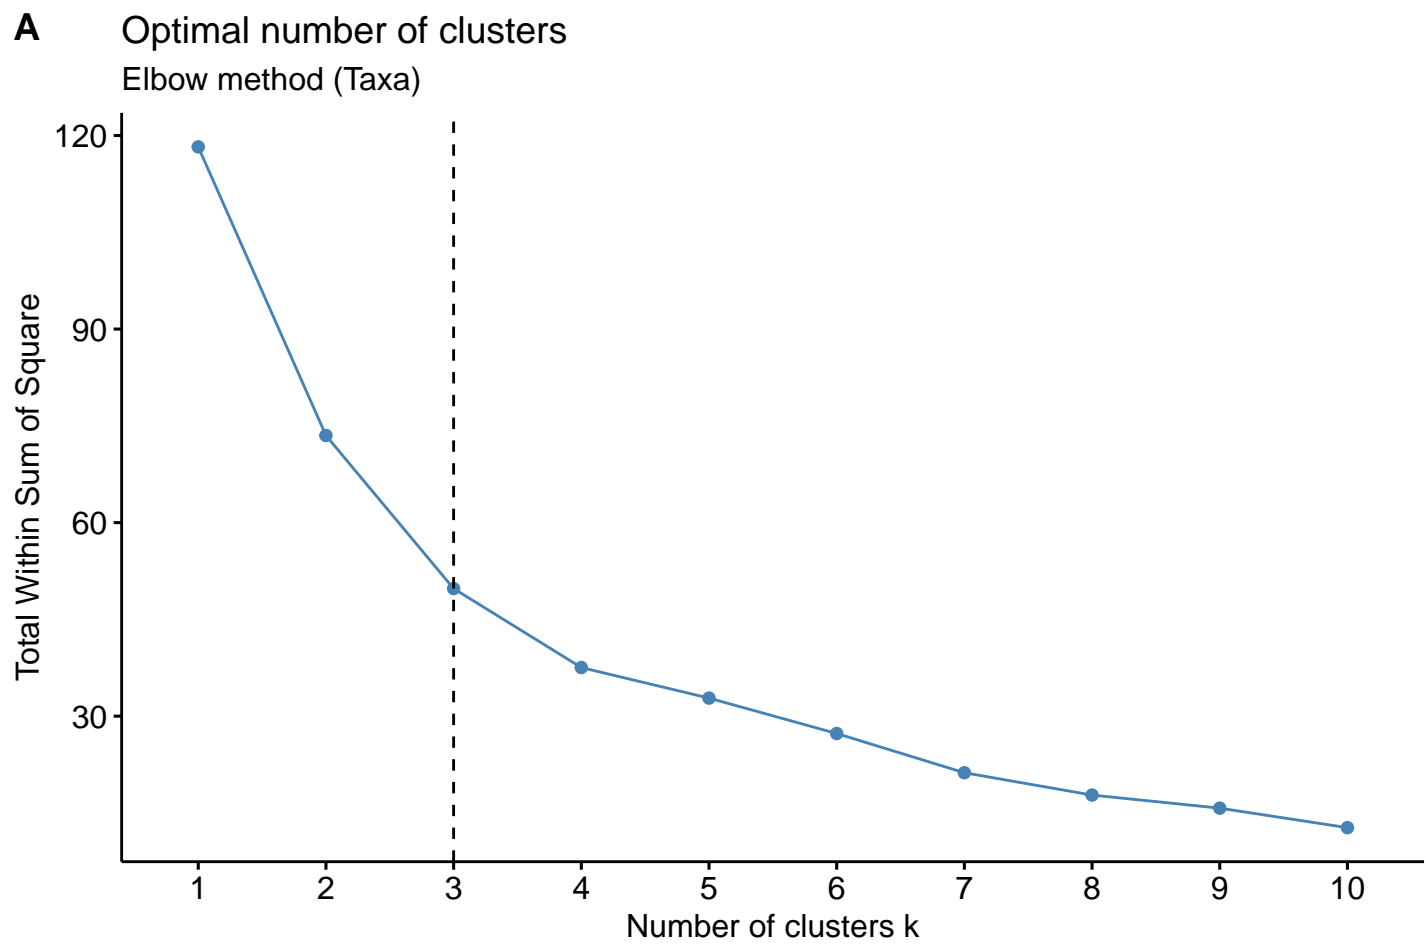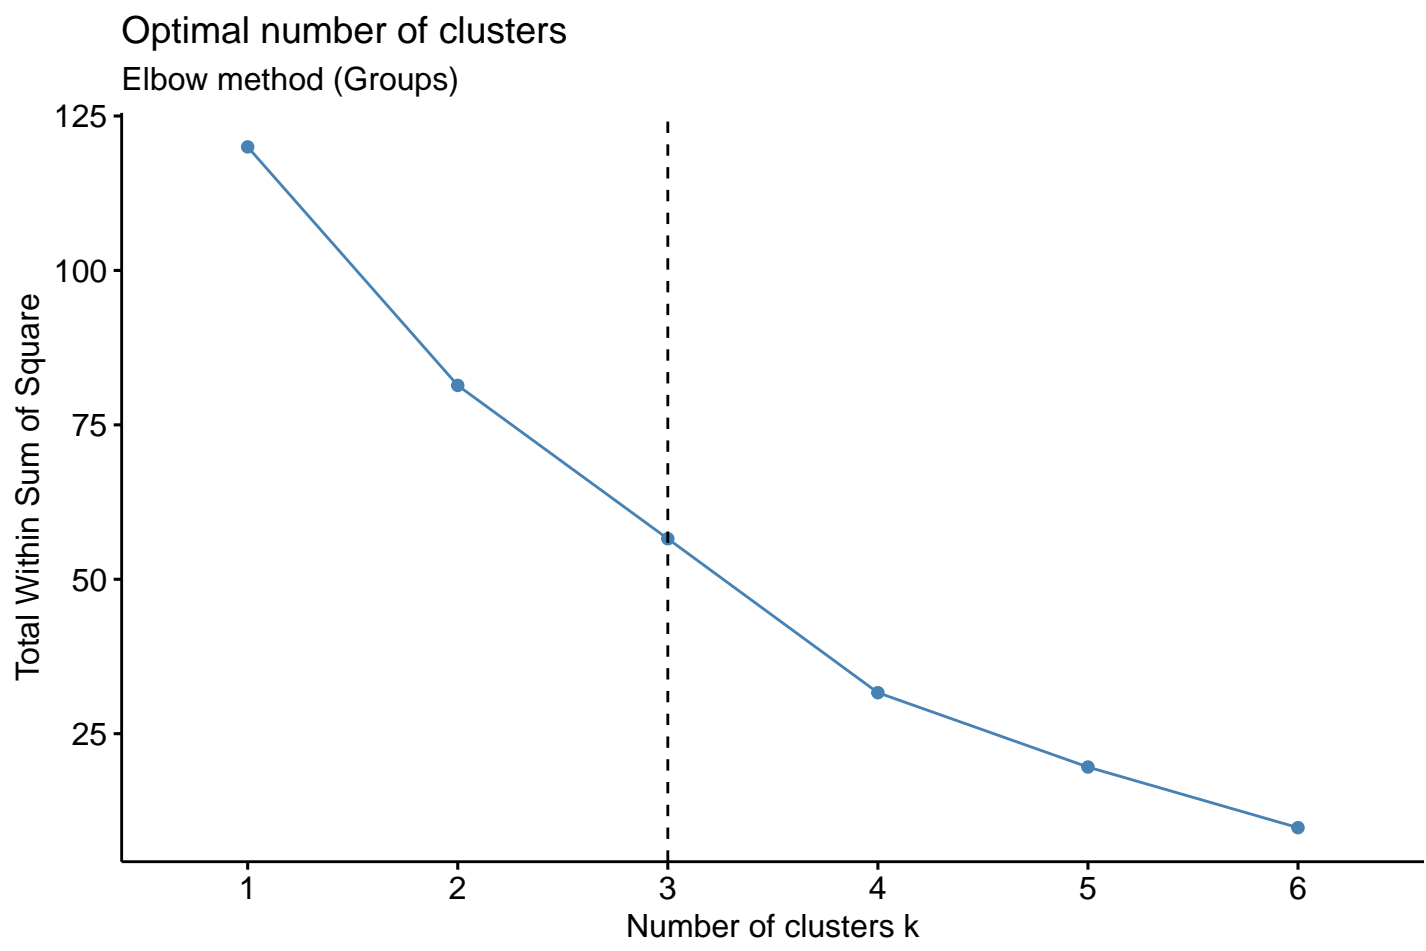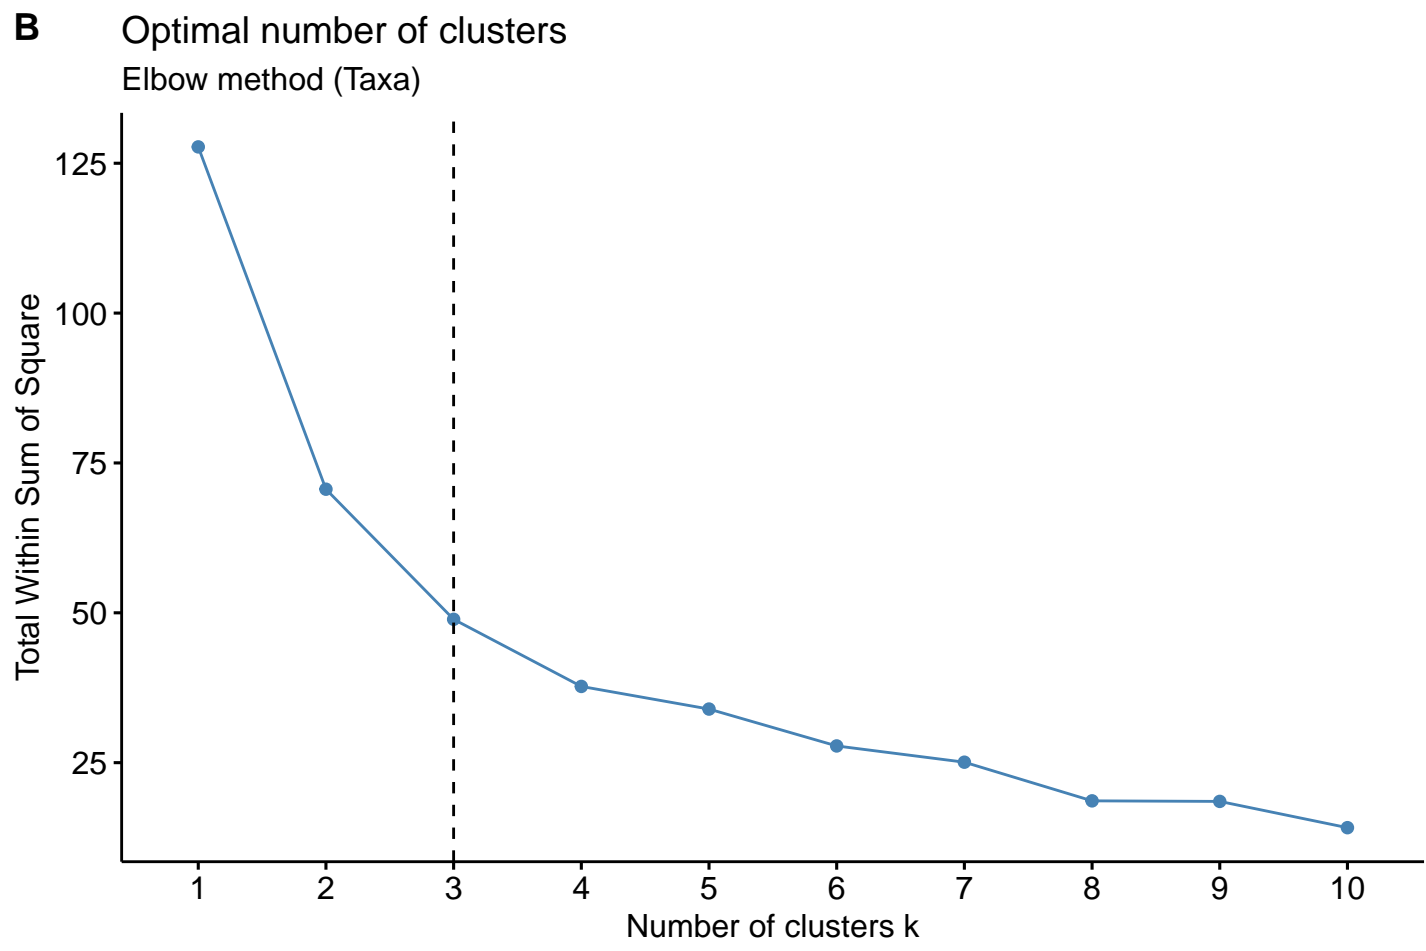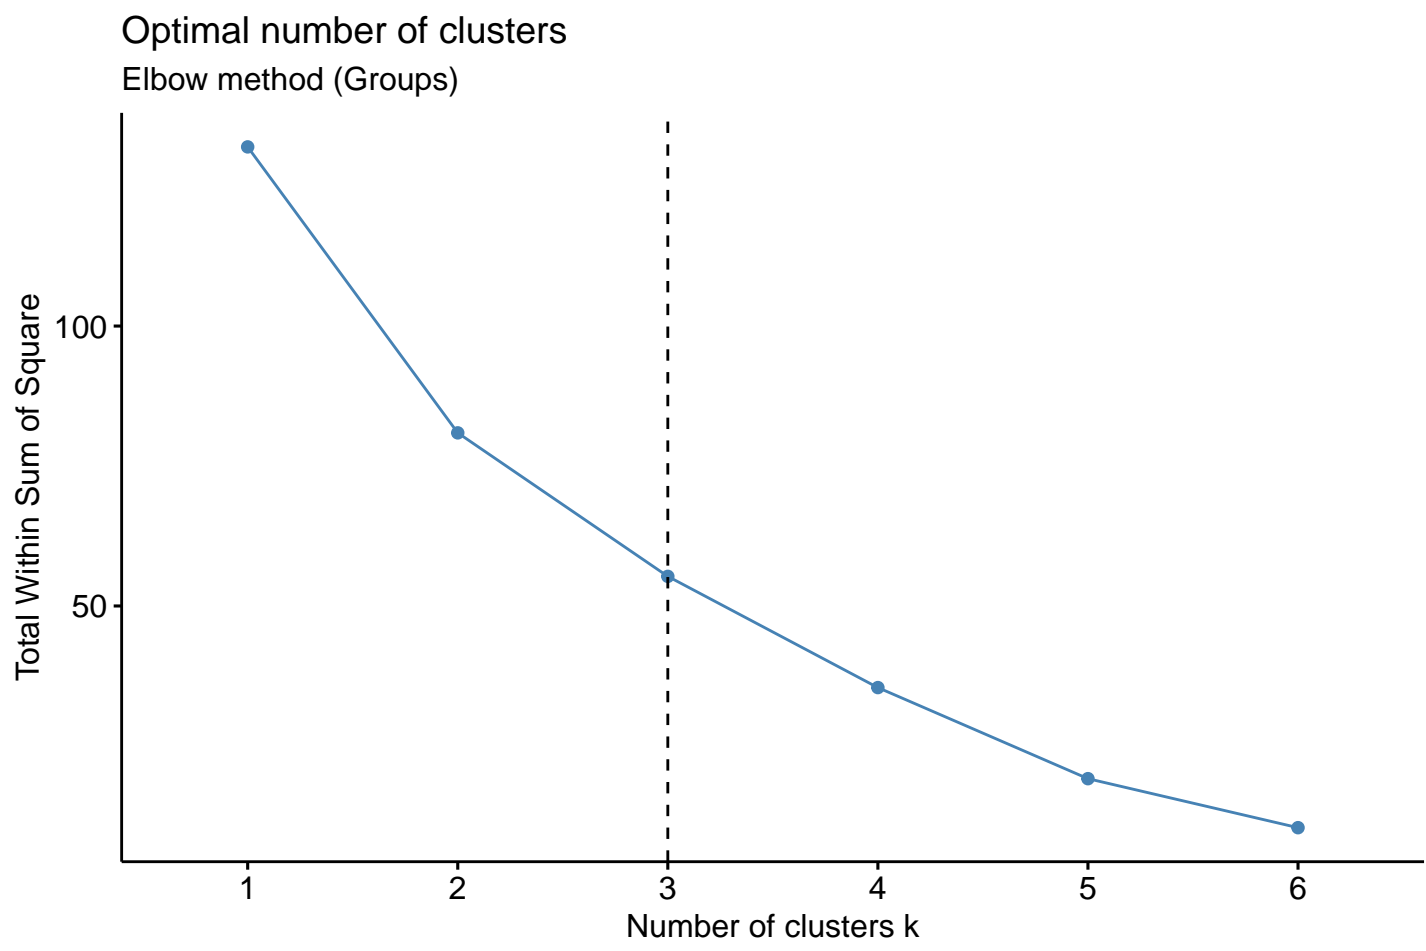

Supplement: mmc4.pdf [file mmc4.pdf]

**A** Bracken Genus Level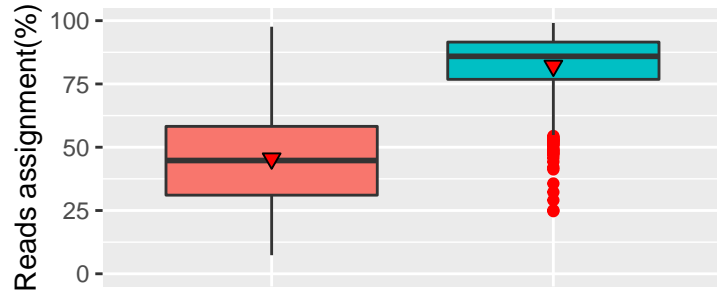**B** Bracken Species Level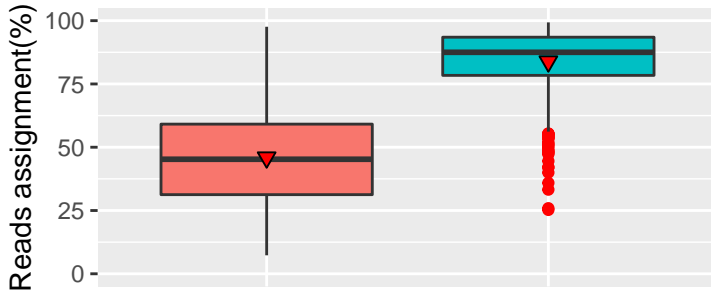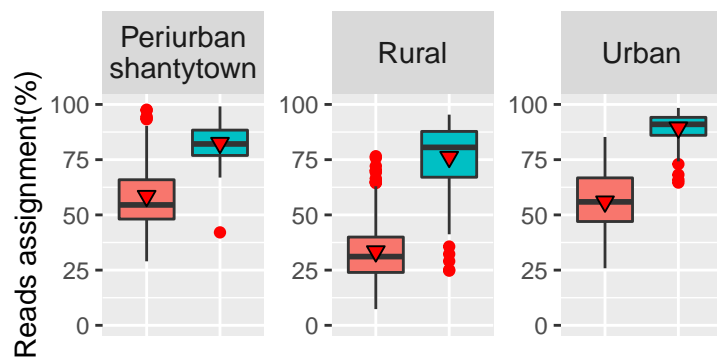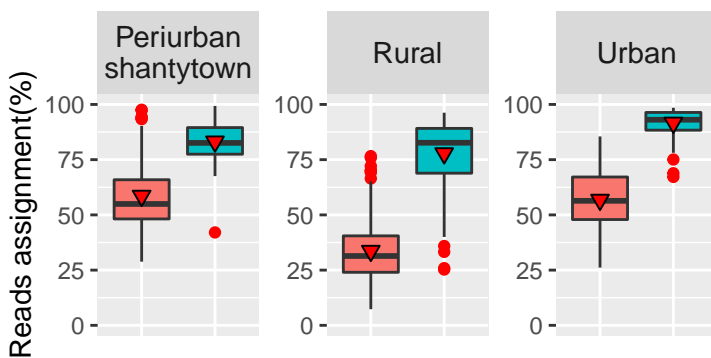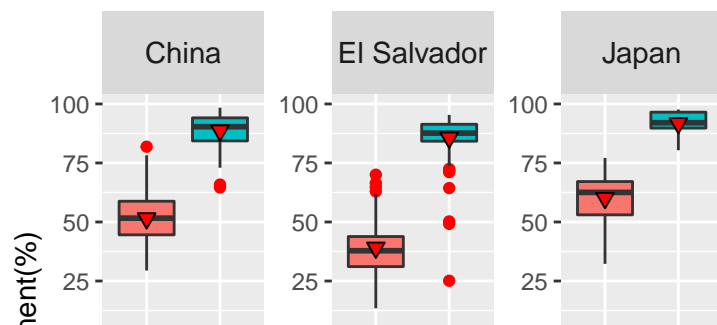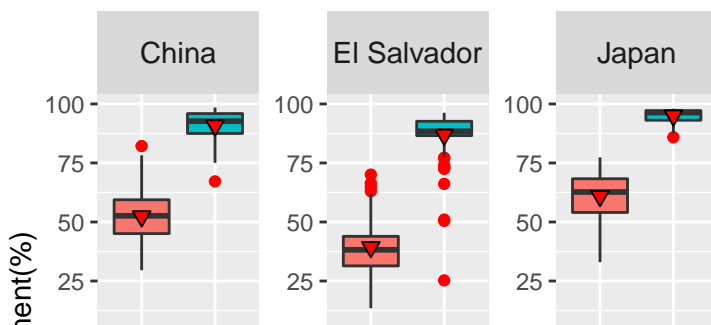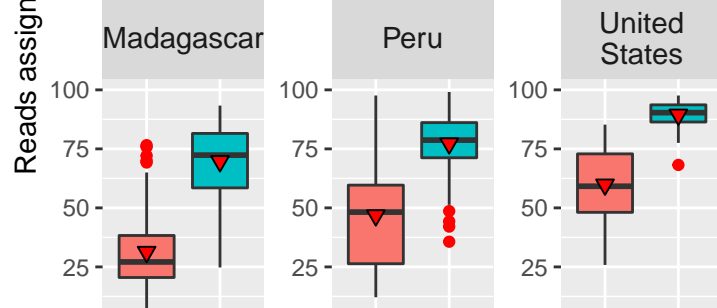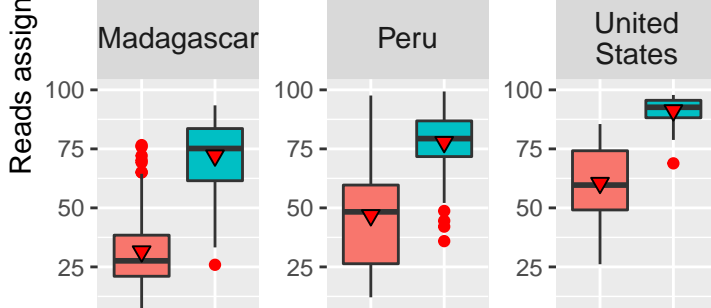

DataBase  NT\_DB  NT-MS-fMAG\_DB

Supplement: mmc5.pdf [file mmc5.pdf]

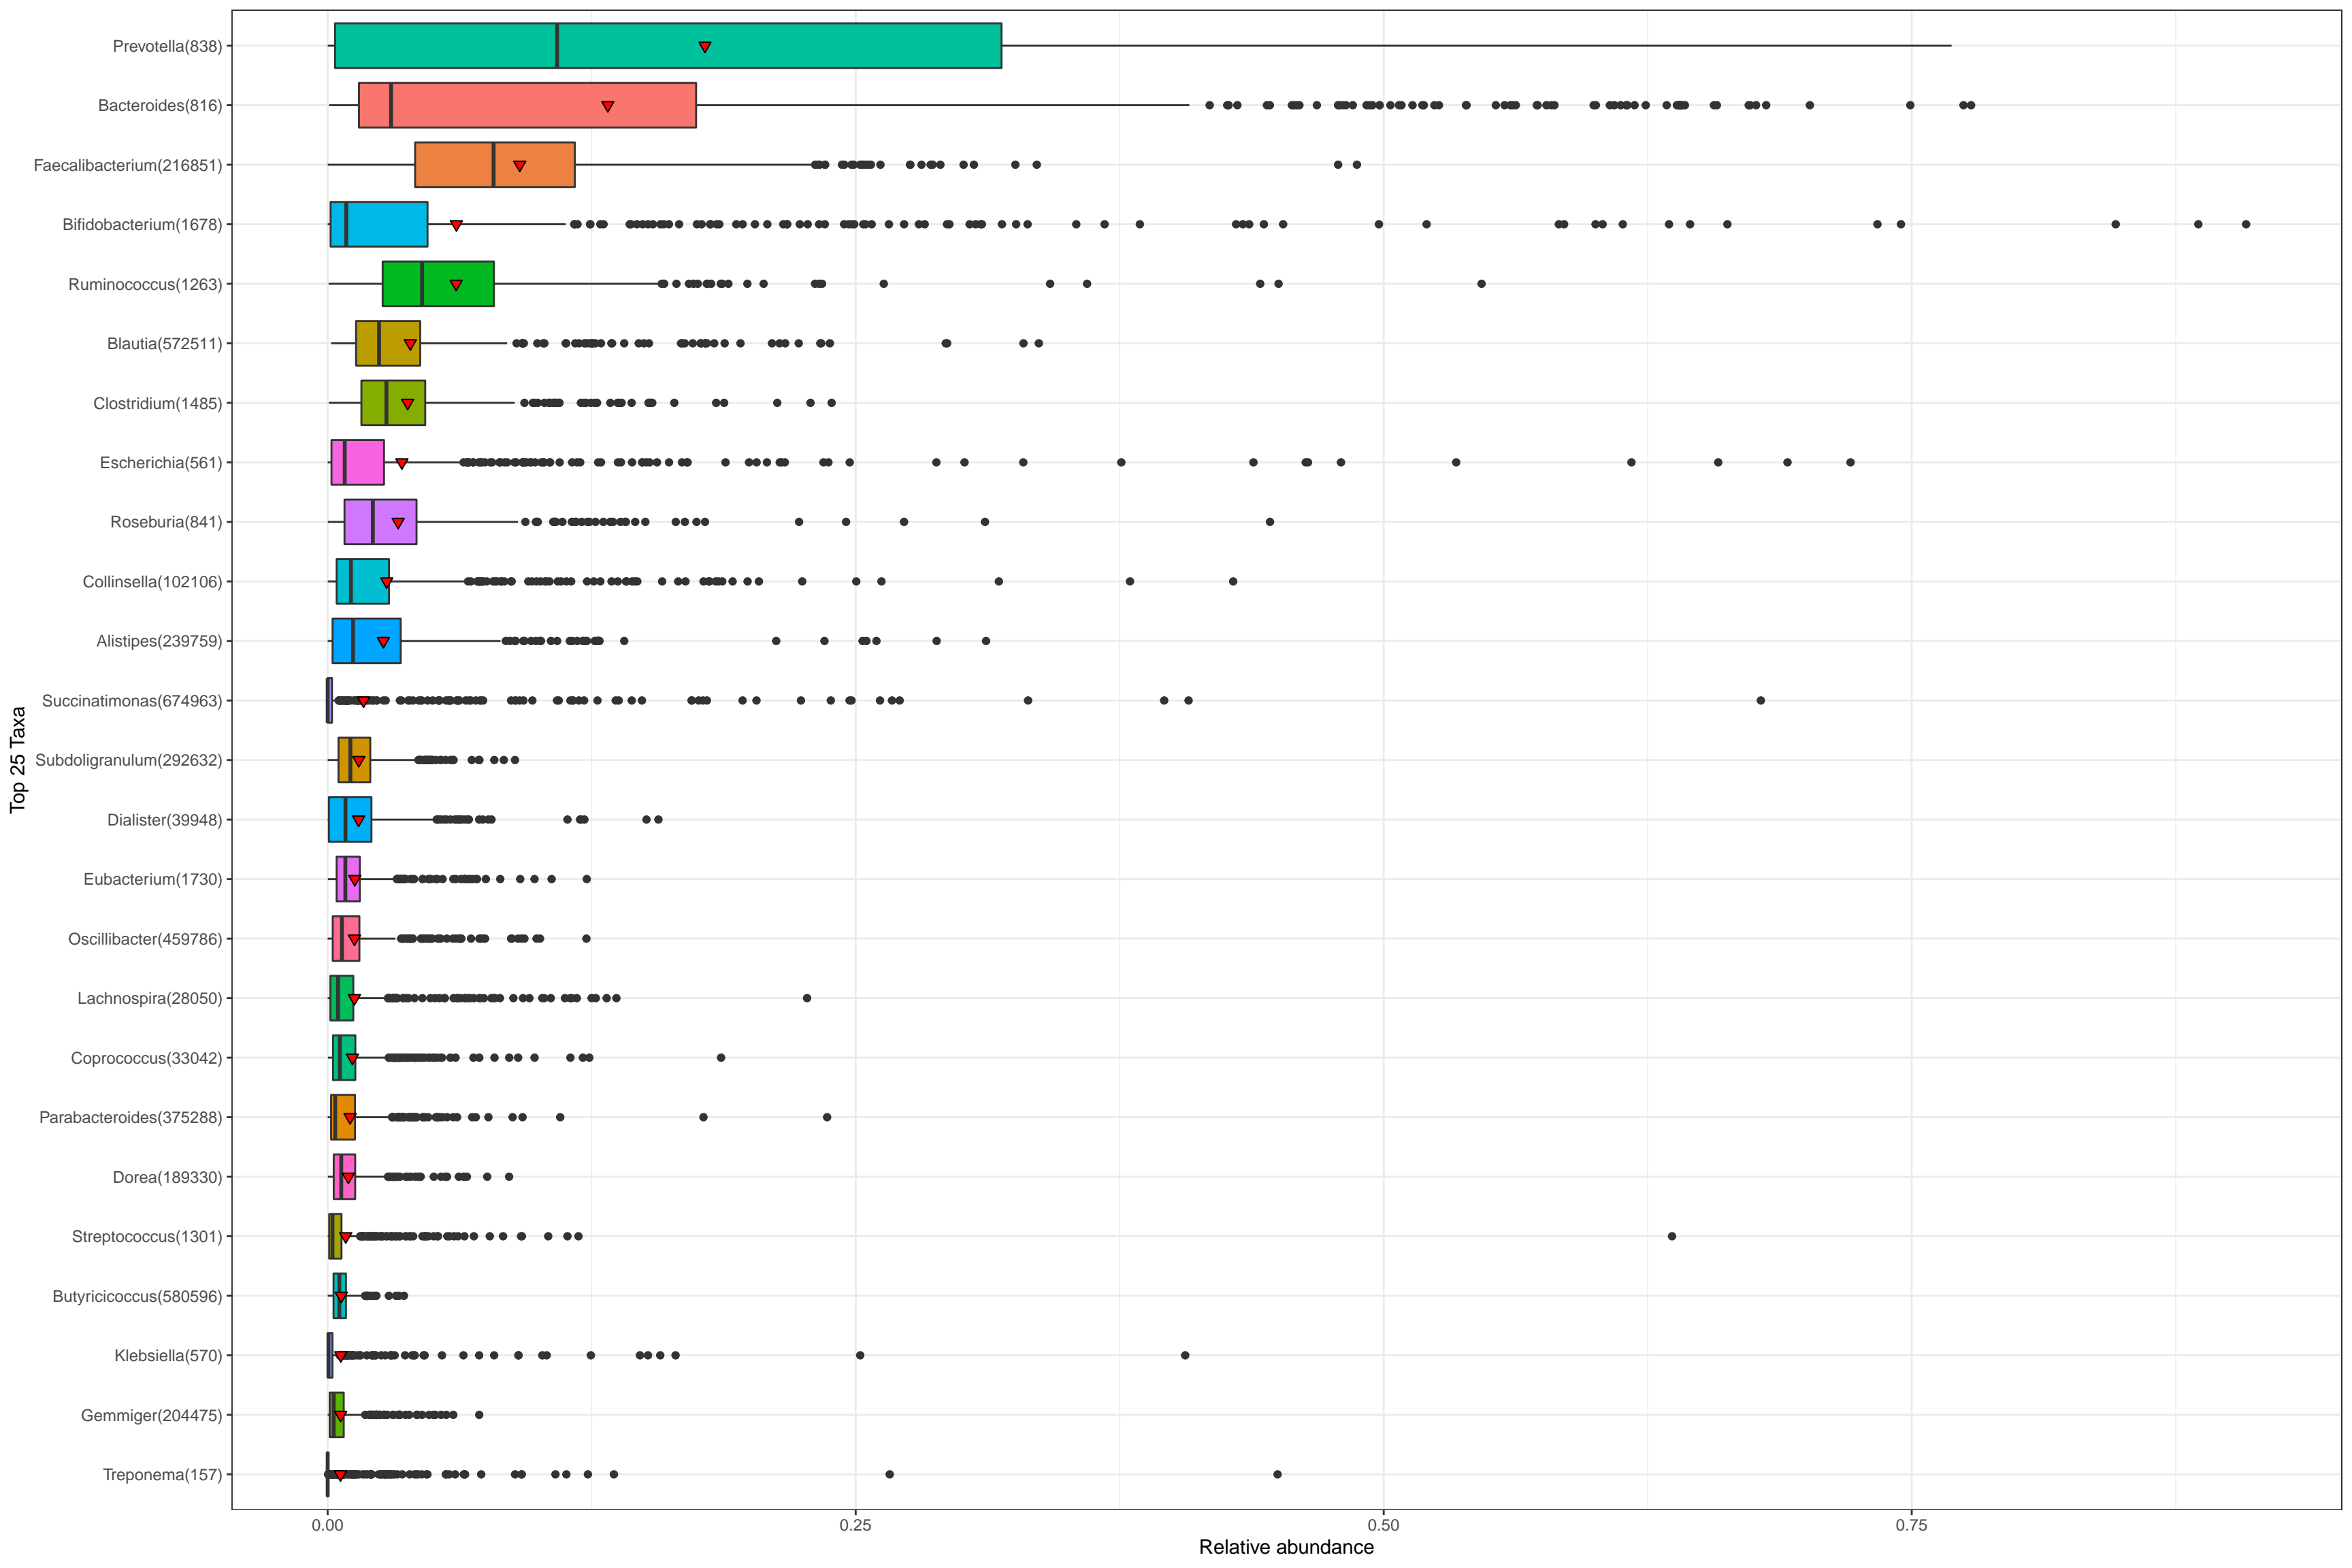

Supplement: mmc6.pdf [file mmc6.pdf]
